# Supplementary material for: The behavior of conductivity dynamic modulus and its connection to thermodynamic bulk modulus in ionic liquids
Source: Royal Society of Chemistry journal article supplement (doi:10.1039/d0cp03422c), 2020-01-01
Supplement: d0cp03422c1.pdf [file d0cp03422c1.pdf]

## Supporting information

### The behavior of conductivity dynamic modulus and its connection to thermodynamic bulk modulus in ionic liquids

Shinian Cheng\*, Zaneta Wojnarowska, Małgorzata Musiał, Marian Paluch\*

Institute of Physics, University of Silesia in Katowice, 75 Pułku Piechoty 1A, 41–500 Chorzów, Poland

\*E-mail: [shinian.cheng@smcebi.edu.pl](mailto:shinian.cheng@smcebi.edu.pl); [marian.paluch@us.edu.pl](mailto:marian.paluch@us.edu.pl)

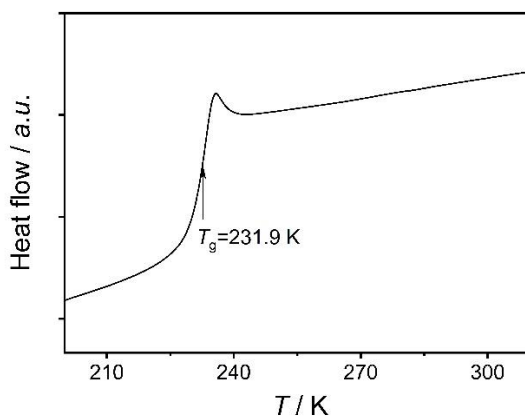

Fig. S1: DSC scan of BMPyr BOB at ambient pressure. The glass-transition temperature of BMPyr BOB is equal to 231.9 K.

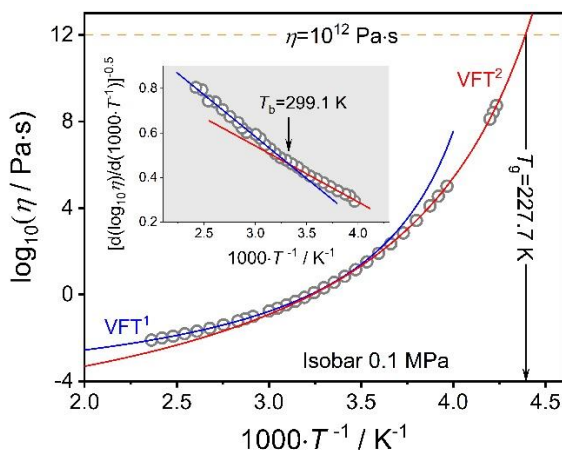

Fig. S2:  $\log_{10}\eta$  as a function of  $1000 \cdot T^{-1}$  at 0.1 MPa for BMPyr BOB; Solid lines denote the fits of VFT equation ( $\log_{10}\eta = \log_{10}\eta_0 + \log_{10}e \cdot D T_0 / (T - T_0)$ ) with parameters:  $\log_{10}\eta_0 = -3.78 \pm 0.02$  Pa s,  $D = 3.57 \pm 0.06$ ,  $T_0 = 219.89 \pm 0.76$  K (VFT<sup>1</sup>);  $\log_{10}\eta_0 = -5.35 \pm 0.05$  Pa s,  $D = 7.58 \pm 0.08$ ,  $T_0 = 191.40 \pm 0.29$  K (VFT<sup>2</sup>). Inset: Stickel plot for tested IL.

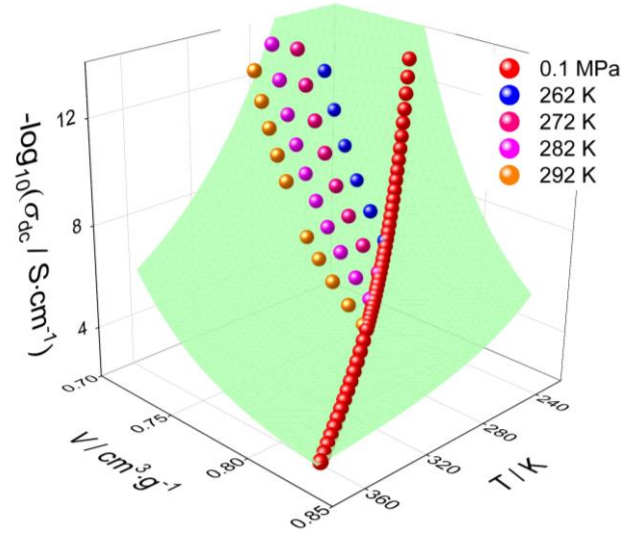

Fig S3: 3D plot of  $-\log_{10}\sigma_{dc}$  vs.  $T$ ,  $V$  for BMPyr BOB. The surface is the fit of Avramov model with the parameters:  $A=1.92\pm 0.06$  S  $\text{cm}^{-1}$ ,  $B=136.97\pm 1.34$ ,  $D_0=3.36\pm 0.05$ , and  $\gamma=4.19\pm 0.03$ .

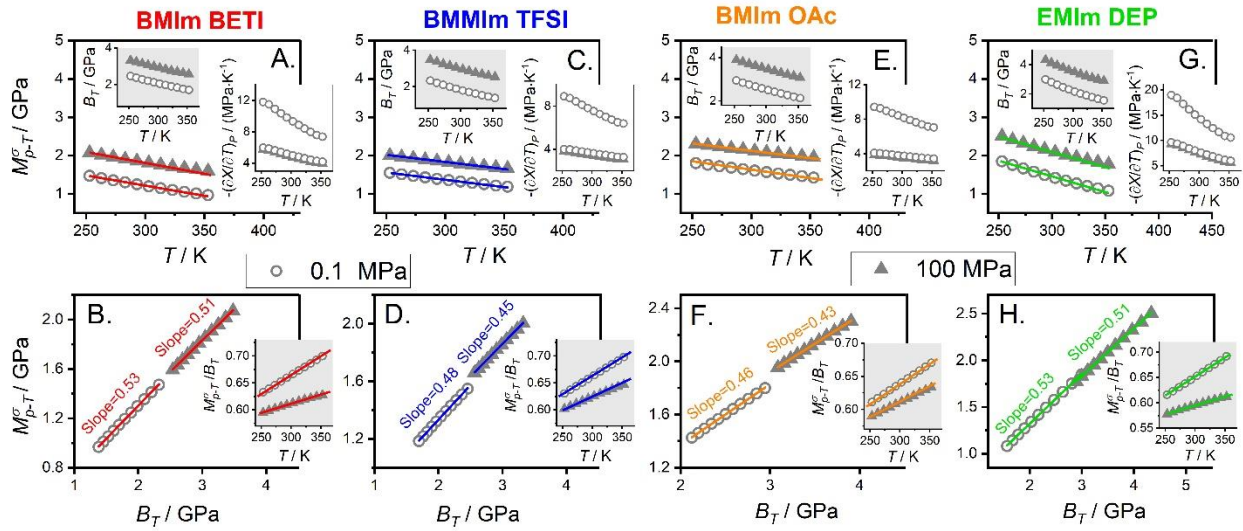

Fig. S4: The behavior of dynamic modulus and its connection to bulk modulus at isobars: 0.1 and 100 MPa for BMIm BETI (planes A and B), BMMIm TFSI (planes C and D), BMIm OAc (planes E and F), and EMIm DEP (planes G and H).

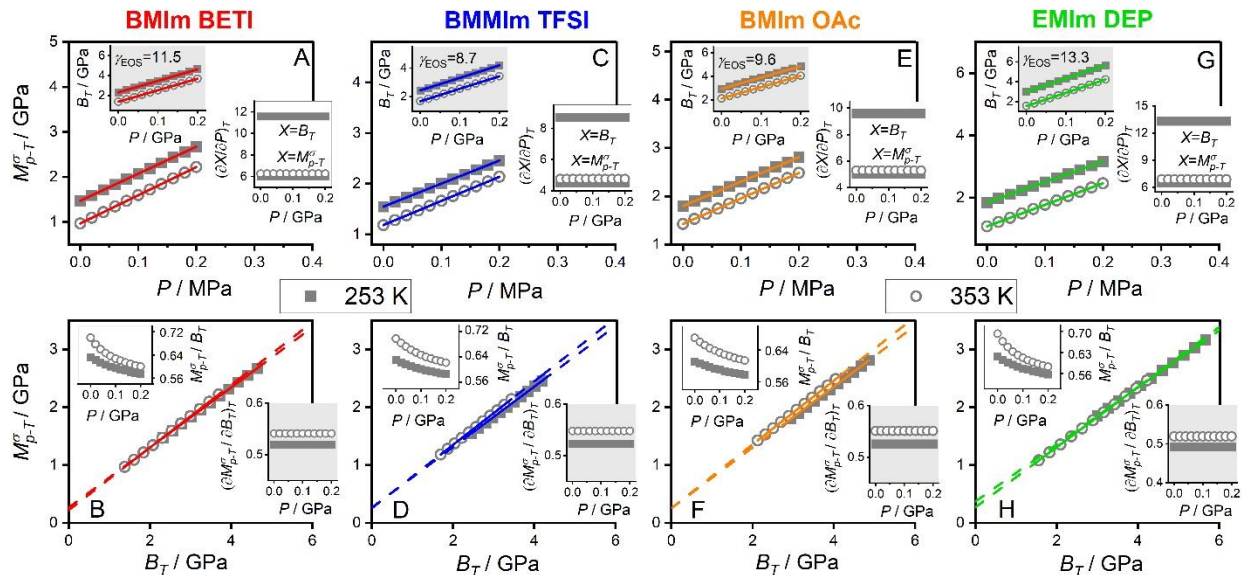

Fig. S5: The behavior of dynamic modulus and its connection to bulk modulus at isotherms: 253 and 353 K for BMIm BETI (planes A and B), BMMIm TFSI (planes C and D), BMIm OAc (planes E and F), and EMIm DEP (planes G and H).

Table S1.

|            | $\gamma$  | $\gamma_{EoS}$ | $T_g / K$                                | $T_b / K$                                | $(dM_{p-T}^\sigma/dB_T)_P$<br>(isobar 0.1 MPa) | $(dM_{p-T}^\sigma/dB_T)_P$<br>(isobar 100 MPa) | $(dM_{p-T}^\sigma/dB_T)_T$<br>(isotherm 253 K) | $(dM_{p-T}^\sigma/dB_T)_T$<br>(isotherm 353 K) |
|------------|-----------|----------------|------------------------------------------|------------------------------------------|------------------------------------------------|------------------------------------------------|------------------------------------------------|------------------------------------------------|
| BMPyr BOB  | 4.19±0.03 | 9.7±0.1        | 227.9 <sup>σ</sup><br>227.7 <sup>η</sup> | 298.6 <sup>σ</sup><br>299.1 <sup>η</sup> | 0.29                                           | 0.28                                           | 0.30                                           | 0.32                                           |
| BMIM BETI  | 2.85±0.05 | 11.5±0.2       | 190.4                                    | -                                        | 0.53                                           | 0.51                                           | 0.52                                           | 0.54                                           |
| BMMIm TFSI | 2.75±0.05 | 8.7±0.1        | 191 <sup>σ</sup><br>195 <sup>DSC</sup>   | 285.7 <sup>σ</sup><br>276 <sup>η</sup>   | 0.48                                           | 0.45                                           | 0.52                                           | 0.55                                           |
| BMIM OAc   | 2.25±0.05 | 9.6±0.1        | 200 <sup>σ</sup><br>203.5 <sup>DSC</sup> | 257                                      | 0.46                                           | 0.43                                           | 0.53                                           | 0.55                                           |
| EMIm DEP   | 2.15±0.03 | 13.3±0.2       | 202.7                                    | -                                        | 0.52                                           | 0.49                                           | 0.53                                           | 0.51                                           |
